# Supplementary material for: How did the COVID-19 Pandemic impact self-reported cancer screening rates in 12 Midwestern states?
Source: bioRxiv or medRxiv preprint supplement (doi:10.1101/2022.04.13.22273837), 2022-04-18
Supplement: Supplementary file [file media-2.pdf]

**Supplemental Table 1 – Change in Self-Reported Difference in Cancer Screening Rates in 2020 – Full Sample of Eligible Adults**

|           | Mammograms |                 | Pap Smears |                 | Blood Stool Tests |                 | Colon/Sigmoidoscopies |                 |
|-----------|------------|-----------------|------------|-----------------|-------------------|-----------------|-----------------------|-----------------|
|           | Difference | Relative Change | Difference | Relative Change | Difference        | Relative Change | Difference            | Relative Change |
| <i>IL</i> | -0.038     | -0.086          | 0.008      | 0.026           | 0.010             | 0.013           | -0.060                | -0.213          |
| <i>IN</i> | -0.181     | -0.400          | -0.067     | -0.194          | -0.030            | -0.034          | -0.012                | -0.041          |
| <i>IA</i> | -0.056     | -0.159          | -0.010     | -0.033          | 0.027             | 0.034           | -0.037                | -0.140          |
| <i>KS</i> | -0.052     | -0.119          | -0.034     | -0.112          | 0.005             | 0.007           | 0.003                 | 0.011           |
| <i>MI</i> | -0.036     | -0.089          | 0.079      | 0.337           | -0.045            | -0.060          | -0.079                | -0.240          |
| <i>MN</i> | -0.009     | -0.024          | -0.010     | -0.032          | -0.014            | -0.017          | -0.089                | -0.316          |
| <i>MO</i> | -0.073     | -0.177          | -0.012     | -0.034          | -0.034            | -0.040          | 0.012                 | 0.046           |
| <i>NE</i> | -0.052     | -0.166          | -0.027     | -0.104          | 0.008             | 0.010           | -0.034                | -0.118          |
| <i>ND</i> | -0.056     | -0.140          | 0.013      | 0.040           | 0.005             | 0.006           | -0.005                | -0.019          |
| <i>OH</i> | -0.082     | -0.209          | -0.098     | -0.250          | 0.026             | 0.032           | -0.059                | -0.196          |
| <i>SD</i> | -0.018     | -0.039          | -0.094     | -0.261          | 0.061             | 0.080           | 0.018                 | 0.052           |
| <i>WI</i> | -0.068     | -0.150          | 0.044      | 0.154           | 0.071             | 0.089           | -0.030                | -0.098          |

*Table 1 reports the difference between 2020-Q4 and 2020-Q1 self-reported cancer screening rates for twelve Midwest states. Table 1 also reports the relative change by dividing the Q4-Q1 difference by the Q1 screening rate. All estimates account for sampling probability weights and seasonal differences in response rates.*

**Supplemental Table 2– Change in Self-Reported Difference in Mammograms Rates in 2020 – by Region**

|           | Difference |        |        | Relative Change |        |        |
|-----------|------------|--------|--------|-----------------|--------|--------|
|           | Metro      | Urban  | Rural  | Metro           | Urban  | Rural  |
| <i>IL</i> | 0.001      | -0.161 | 0.044  | 0.003           | -0.346 | 0.108  |
| <i>IN</i> | -0.168     | -0.024 | -0.359 | -0.366          | -0.063 | -0.773 |
| <i>IA</i> | -0.098     | -0.012 | 0.152  | -0.265          | -0.045 | 0.547  |
| <i>KS</i> | -0.066     | -0.114 | 0.000  | -0.143          | -0.270 | 0.001  |
| <i>MI</i> | -0.003     | -0.043 | -0.173 | -0.008          | -0.080 | -0.316 |
| <i>MN</i> | -0.022     | 0.057  | 0.008  | -0.059          | 0.144  | 0.021  |
| <i>MO</i> | -0.076     | -0.070 | -0.038 | -0.184          | -0.165 | -0.099 |
| <i>NE</i> | -0.116     | -0.124 | 0.166  | -0.403          | -0.311 | 0.615  |
| <i>ND</i> | -0.067     | -0.061 | -0.007 | -0.164          | -0.151 | -0.020 |
| <i>OH</i> | -0.102     | -0.050 | -0.018 | -0.249          | -0.185 | -0.050 |
| <i>SD</i> | 0.052      | -0.055 | -0.070 | 0.117           | -0.117 | -0.130 |
| <i>WI</i> | -0.057     | -0.223 | 0.056  | -0.123          | -0.452 | 0.162  |

*Table 2 reports the difference between 2020-Q4 and 2020-Q1 self-reported mammogram rates for twelve Midwest states, by metro/urban/rural status of the respondent. Table 2 also reports the relative change by dividing the Q4-Q1 difference by the Q1 screening rate. All estimates account for sampling probability weights and seasonal differences in response rates.*

**Supplemental Table 3– Change in Self-Reported Difference in Pap Smear Rates in 2020 – by Region**

|           | Difference |        |        | Relative Change |        |        |
|-----------|------------|--------|--------|-----------------|--------|--------|
|           | Metro      | Urban  | Rural  | Metro           | Urban  | Rural  |
| <i>IL</i> | 0.004      | -0.051 | 0.093  | 0.011           | -0.183 | 0.314  |
| <i>IN</i> | -0.094     | 0.094  | 0.055  | -0.256          | 0.303  | 0.355  |
| <i>IA</i> | -0.017     | -0.108 | 0.073  | -0.054          | -0.353 | 0.255  |
| <i>KS</i> | -0.039     | -0.046 | 0.016  | -0.121          | -0.170 | 0.051  |
| <i>MI</i> | 0.099      | -0.017 | -0.015 | 0.400           | -0.079 | -0.081 |
| <i>MN</i> | -0.010     | -0.027 | 0.001  | -0.032          | -0.092 | 0.006  |
| <i>MO</i> | -0.061     | 0.130  | 0.135  | -0.158          | 0.475  | 0.606  |
| <i>NE</i> | -0.033     | -0.098 | 0.029  | -0.123          | -0.327 | 0.136  |
| <i>ND</i> | -0.022     | 0.042  | 0.055  | -0.058          | 0.180  | 0.231  |
| <i>OH</i> | -0.101     | -0.071 | -0.097 | -0.250          | -0.215 | -0.260 |
| <i>SD</i> | -0.146     | 0.087  | -0.122 | -0.402          | 0.258  | -0.319 |
| <i>WI</i> | 0.014      | 0.089  | 0.129  | 0.044           | 0.461  | 0.517  |

*Table 3 reports the difference between 2020-Q4 and 2020-Q1 self-reported pap smear rates for twelve Midwest states, by metro/urban/rural status of the respondent. Table 3 also reports the relative change by dividing the Q4-Q1 difference by the Q1 screening rate. All estimates account for sampling probability weights and seasonal differences in response rates.*

**Supplemental Table 4– Change in Self-Reported Difference in Blood Stool Test Rates in 2020 – by Region**

|           | Difference |        |        | Relative Change |        |        |
|-----------|------------|--------|--------|-----------------|--------|--------|
|           | Metro      | Urban  | Rural  | Metro           | Urban  | Rural  |
| <i>IL</i> | 0.033      | 0.004  | -0.029 | 0.042           | 0.004  | -0.037 |
| <i>IN</i> | -0.056     | 0.169  | 0.095  | -0.062          | 0.201  | 0.108  |
| <i>IA</i> | 0.022      | 0.058  | 0.028  | 0.027           | 0.068  | 0.037  |
| <i>KS</i> | 0.051      | -0.051 | -0.067 | 0.070           | -0.063 | -0.084 |
| <i>MI</i> | -0.054     | 0.085  | -0.077 | -0.071          | 0.124  | -0.095 |
| <i>MN</i> | -0.021     | 0.027  | -0.011 | -0.026          | 0.032  | -0.014 |
| <i>MO</i> | -0.035     | -0.018 | -0.042 | -0.042          | -0.022 | -0.052 |
| <i>NE</i> | 0.074      | -0.036 | -0.078 | 0.095           | -0.045 | -0.097 |
| <i>ND</i> | -0.017     | -0.016 | 0.088  | -0.021          | -0.020 | 0.125  |
| <i>OH</i> | 0.058      | -0.087 | -0.075 | 0.074           | -0.104 | -0.091 |
| <i>SD</i> | -0.081     | 0.161  | 0.277  | -0.102          | 0.209  | 0.392  |
| <i>WI</i> | 0.133      | -0.084 | -0.026 | 0.167           | -0.103 | -0.030 |

*Table 4 reports the difference between 2020-Q4 and 2020-Q1 self-reported blood stool kit test rates for twelve Midwest states, by metro/urban/rural status of the respondent. Table 4 also reports the relative change by dividing the Q4-Q1 difference by the Q1 screening rate. All estimates account for sampling probability weights and seasonal differences in response rates.*

**Supplemental Table 5– Change in Self-Reported Difference in Colon and Sigmoidoscopy Rates in 2020 – by Region**

|           | Difference |        |        | Relative Change |        |        |
|-----------|------------|--------|--------|-----------------|--------|--------|
|           | Metro      | Urban  | Rural  | Metro           | Urban  | Rural  |
| <i>IL</i> | -0.073     | -0.063 | -0.021 | -0.262          | -0.221 | -0.073 |
| <i>IN</i> | 0.008      | -0.323 | 0.032  | 0.027           | -0.700 | 0.293  |
| <i>IA</i> | -0.009     | -0.091 | -0.143 | -0.035          | -0.356 | -0.435 |
| <i>KS</i> | -0.021     | 0.036  | 0.036  | -0.077          | 0.191  | 0.142  |
| <i>MI</i> | -0.085     | -0.120 | -0.052 | -0.256          | -0.350 | -0.165 |
| <i>MN</i> | -0.079     | -0.059 | -0.192 | -0.274          | -0.243 | -0.700 |
| <i>MO</i> | 0.017      | 0.006  | -0.047 | 0.062           | 0.027  | -0.153 |
| <i>NE</i> | -0.141     | 0.157  | -0.121 | -0.401          | 0.721  | -0.395 |
| <i>ND</i> | -0.019     | -0.022 | 0.027  | -0.066          | -0.087 | 0.121  |
| <i>OH</i> | -0.064     | 0.085  | -0.079 | -0.212          | 0.413  | -0.238 |
| <i>SD</i> | 0.066      | -0.031 | -0.082 | 0.180           | -0.103 | -0.233 |
| <i>WI</i> | -0.062     | 0.039  | 0.038  | -0.186          | 0.158  | 0.162  |

*Table 5 reports the difference between 2020-Q4 and 2020-Q1 self-reported colon/sigmoidoscopy rates for twelve Midwest states, by metro/urban/rural status of the respondent. Table 5 also reports the relative change by dividing the Q4-Q1 difference by the Q1 screening rate. All estimates account for sampling probability weights and seasonal differences in response rates.*

**Supplemental Table 6 – Change in Self-Reported Blood Stool & Colon/Sigmoidoscopy Rates in 2020 – by Gender**

|           | Blood Stool Tests |        |                 |        | Colon/Sigmoidoscopies |        |                 |        |
|-----------|-------------------|--------|-----------------|--------|-----------------------|--------|-----------------|--------|
|           | Difference        |        | Relative Change |        | Difference            |        | Relative Change |        |
|           | Female            | Male   | Female          | Male   | Female                | Male   | Female          | Male   |
| <i>IL</i> | -0.002            | 0.020  | -0.002          | 0.025  | -0.052                | -0.068 | -0.179          | -0.246 |
| <i>IN</i> | -0.076            | 0.020  | -0.083          | 0.022  | 0.104                 | -0.118 | 0.382           | -0.402 |
| <i>IA</i> | 0.027             | 0.023  | 0.034           | 0.029  | -0.070                | -0.007 | -0.222          | -0.033 |
| <i>KS</i> | -0.025            | 0.043  | -0.033          | 0.056  | 0.029                 | -0.026 | 0.124           | -0.102 |
| <i>MI</i> | -0.078            | -0.010 | -0.102          | -0.013 | -0.088                | -0.068 | -0.240          | -0.233 |
| <i>MN</i> | -0.019            | -0.009 | -0.024          | -0.011 | -0.098                | -0.084 | -0.319          | -0.331 |
| <i>MO</i> | -0.034            | -0.034 | -0.042          | -0.040 | 0.015                 | 0.008  | 0.050           | 0.034  |
| <i>NE</i> | -0.038            | 0.034  | -0.047          | 0.043  | -0.024                | -0.036 | -0.073          | -0.136 |
| <i>ND</i> | -0.006            | 0.010  | -0.008          | 0.013  | 0.008                 | -0.018 | 0.032           | -0.066 |
| <i>OH</i> | 0.031             | 0.023  | 0.039           | 0.029  | -0.047                | -0.072 | -0.149          | -0.250 |
| <i>SD</i> | 0.034             | 0.095  | 0.044           | 0.123  | 0.082                 | -0.043 | 0.204           | -0.147 |
| <i>WI</i> | 0.059             | 0.081  | 0.075           | 0.100  | -0.091                | 0.037  | -0.299          | 0.123  |

*Table 6 reports the difference between 2020-Q4 and 2020-Q1 self-reported blood stool test and colon/sigmoidoscopy rates for twelve Midwest states, by self-reported gender of the respondent. Table 6 also reports the relative change by dividing the Q4-Q1 difference by the Q1 screening rate. All estimates account for sampling probability weights and seasonal differences in response rates.*
